# Supplementary material for: Relative Validity and Reproducibility of Dietary Measurements Assessed by a Semiquantitative Food Frequency Questionnaire among Chinese Healthy Adults
Source: MDPI journal article supplement (doi:10.3390/nu15030545), 2023-01-20
Supplement: s1 [file s1]

**Table S1.** Characteristics of participants in the validation study <sup>a</sup>.

| Variables                          | Total<br>(n=49)  | IHPP-I<br>(n=27) | CCC<br>(n=22)    |
|------------------------------------|------------------|------------------|------------------|
| Age at enrollment, years           | 29.0(26.0, 45.0) | 27.0(24.0, 29.0) | 47.0(30.0, 55.8) |
| Men, %                             | 18(36.7)         | 13(48.1)         | 5(22.7)          |
| Bachelor or higher degrees, %      | 33(67.3)         | 25(92.6)         | 8(36.4)          |
| Married, %                         | 27(55.1)         | 6(22.2)          | 21(95.5)         |
| Current smoker, %                  | 1(2.0)           | 0(0.0)           | 1(4.5)           |
| Weight, kg                         | 60.9(54.3, 69.9) | 59.6(53.1, 69.3) | 61.7(57.6, 69.4) |
| Body mass index, kg/m <sup>2</sup> | 21.3(20.4, 25.6) | 22.2(20.1, 25.1) | 23.7(22.2, 26.4) |

Abbreviations: IHPP-I: International Human Phenome Project (phase I); CCC: Central China Cohort.

<sup>a</sup> Data were expressed as median (interquartile ranges) for continuous variables and no (percentage) for categorical variables.

**Table S2.** Median (interquartile ranges) nutrient intakes estimated by the SFFQ and the 24-HDRs.

| Nutrients                    | SFFQ                   | 24-HDRs                |
|------------------------------|------------------------|------------------------|
| Total energy, kcal/day       | 1816.8(1537.3, 2140.8) | 1548.4(1359.7, 2021.4) |
| Carbohydrate, g/day          | 211.2(170.3, 264.4)    | 189.2(142.8, 268.5)    |
| Fat, g/day                   | 76.6(57.3, 91.8)       | 63.7(47.0, 79.7)       |
| Protein, g/day               | 72.1(56.0, 91.4)       | 63.8(49.1, 78.9)       |
| Fiber, g/day                 | 14.0(10.2, 19.0)       | 9.2(6.6, 12.3)         |
| Cholesterol, mg/day          | 477.2(416.0, 550.1)    | 225.4(151.1, 350.3)    |
| Vitamin A, µgRE/day          | 1187.3(749.5, 1384.6)  | 299.1(186.7, 454.5)    |
| Total carotene, µg/day       | 2166.8(1719.1, 3312.9) | 829.0(344.2, 1946.5)   |
| Retinol, mg/day              | 698.6(515.1, 1117.6)   | 89.2(42.4, 182.6)      |
| Thiamin, mg/day              | 0.9(0.7, 1.1)          | 0.6(0.4, 0.8)          |
| Riboflavin, mg/day           | 1.5(1.2, 1.8)          | 0.8(0.6, 1.0)          |
| Niacin, mg/day               | 15.6(11.8, 23.0)       | 13.5(8.6, 15.2)        |
| Vitamin C, mg/day            | 110.8(85.2, 167.0)     | 51.7(31.5, 86.4)       |
| Vitamin E, mg/day            | 31.2(21.6, 39.4)       | 14.9(10.3, 19.6)       |
| Calcium, mg/day              | 899.6(745.5, 1108.1)   | 386.0(329.3, 501.6)    |
| Phosphorus, mg/day           | 1261.6(1027.7, 1517.7) | 834.1(666.1, 1058.2)   |
| Potassium, mg/day            | 2993.5(2255.5, 3453.9) | 1584.0(1286.8, 2022.1) |
| Sodium, mg/day               | 7314.1(6856.7, 7695.8) | 1431.0(673.4, 1793.8)  |
| Magnesium, mg/day            | 380.6(296.1, 448.2)    | 227.7(168.3, 299.6)    |
| Iron, mg/day                 | 28.4(22.6, 32.7)       | 14.8(11.3, 17.9)       |
| Zinc, mg/day                 | 11.5(8.8, 14.3)        | 7.2(5.5, 9.1)          |
| Selenium, µg/day             | 50.3(41.0, 62.5)       | 34.4(24.7, 42.6)       |
| Copper, mg/day               | 2.4(2.0, 4.4)          | 1.1(0.9, 1.6)          |
| Manganese, mg/day            | 4.3(3.6, 5.5)          | 3.0(2.1, 3.9)          |
| AAA, mg/day                  | 3783.9(2902.1, 4694.6) | 3422.6(2514.9, 4367.4) |
| BCAA, mg/day                 | 5866.2(4460.5, 7304.9) | 5932.9(4541.8, 7166.2) |
| SAA, mg/day                  | 1116.8(830.6, 1407.0)  | 1234.2(882.7, 1638.9)  |
| TFA, g/day                   | 36.1(23.5, 43.0)       | 36.4(22.6, 53.7)       |
| SFA, g/day                   | 17.0(10.9, 20.4)       | 14.9(9.0, 23.6)        |
| MUFA, g/day                  | 14.0(9.5, 17.8)        | 15.2(9.5, 22.3)        |
| PUFA, g/day                  | 3.2(2.3, 4.9)          | 4.8(3.7, 6.4)          |
| MUFA (% of TFA) <sup>a</sup> | 41.2(38.5, 42.3)       | 42.2(40.0, 44.8)       |
| PUFA (% of TFA) <sup>a</sup> | 10.0(9.1, 11.9)        | 13.7(10.7, 19.9)       |

Abbreviations: SFFQ: semiquantitative food frequency questionnaire; 24-HDRs: 24-hour dietary recalls; AAA: aromatic amino acids; BCAA: branched-chain amino acids; SAA: sulfur-containing amino acids; TFA: total fatty acids; SFA: saturated fatty acids; MUFA: monounsaturated fatty acids; PUFA: polyunsaturated fatty acids.

<sup>a</sup> The percentage of monounsaturated fatty acids or polyunsaturated fatty acids to total fatty acids.

**Table S3.** Median (interquartile ranges) food group intakes estimated by the SFFQ and the 24-HDRs by participant sources.

| Food groups             | IHPP-I              |                     |                     | CCC                 |                     |
|-------------------------|---------------------|---------------------|---------------------|---------------------|---------------------|
|                         | SFFQ1               | SFFQ2               | 24-HDRs             | SFFQ                | 24-HDRs             |
| Refined grains, g/day   | 262.0(139.7, 327.3) | 262.0(157.3, 341.4) | 183.0(158.3, 221.7) | 143.0(120.3, 177.4) | 245.0(146.2, 350.2) |
| Whole grains, g/day     | 14.3(10.0, 57.1)    | 14.3(6.7, 35.7)     | 3.3(0.0, 28.7)      | 57.1(14.3, 85.7)    | 105.8(12.7, 171.7)  |
| Tubers, g/day           | 57.1(14.3, 57.1)    | 57.1(14.3, 85.7)    | 33.3(15.8, 65.2)    | 57.1(14.3, 85.7)    | 25.0(10.4, 71.7)    |
| Legumes, g/day          | 32.6(14.8, 65.0)    | 24.7(13.5, 44.7)    | 18.7(10.0, 23.3)    | 16.6(12.3, 23.5)    | 11.0(3.3, 19.1)     |
| Vegetables, g/day       | 311.4(226.2, 372.6) | 307.1(169.5, 456.9) | 97.7(68.8, 143.7)   | 243.8(210.7, 365.2) | 95.5(41.3, 196.2)   |
| Salty vegetables, g/day | 1.7(1.7, 5.0)       | 1.7(1.7, 5.0)       | 0.0(0.0, 2.5)       | 1.7(1.7, 1.7)       | 0.0(0.0, 0.0)       |
| Mushrooms, g/day        | 33.6(12.1, 57.1)    | 35.7(11.1, 57.1)    | 6.7(0.0, 9.7)       | 12.1(10.0, 14.3)    | 0.0(0.0, 9.6)       |
| Fruit, g/day            | 182.6(110.2, 241.0) | 171.2(100.2, 237.7) | 56.4(41.6, 127.8)   | 138.8(99.0, 238.3)  | 111.7(34.2, 277.7)  |
| Red meat, g/day         | 71.4(41.8, 100.0)   | 57.1(48.9, 89.3)    | 60.0(30.7, 90.2)    | 14.3(10.0, 35.7)    | 5.0(0.4, 22.9)      |
| Poultry, g/day          | 28.6(28.6, 46.4)    | 28.6(28.6, 42.9)    | 42.0(16.1, 71.1)    | 7.1(5.0, 7.1)       | 0.0(0.0, 0.0)       |
| Animal organs, g/day    | 6.7(3.3, 9.4)       | 6.7(3.3, 10.0)      | 0.0(0.0, 5.8)       | 3.3(3.3, 5.8)       | 0.0(0.0, 1.3)       |
| Processed meat, g/day   | 5.0(3.3, 7.1)       | 5.0(3.3, 17.9)      | 1.7(0.0, 10.0)      | 1.7(1.7, 5.0)       | 0.0(0.0, 0.0)       |
| Seafood, g/day          | 24.0(18.0, 66.9)    | 33.8(23.1, 60.8)    | 16.3(0.0, 29.5)     | 14.7(11.3, 28.8)    | 0.0(0.0, 2.5)       |
| Eggs, g/day             | 62.0(58.7, 67.3)    | 62.0(55.4, 80.1)    | 42.4(23.5, 65.8)    | 62.0(57.4, 62.0)    | 33.3(12.7, 74.5)    |
| Dairy products, g/day   | 205.2(112.4, 393.3) | 211.2(92.0, 314.0)  | 83.3(5.8, 197.3)    | 248.1(74.9, 312.4)  | 25.0(0.0, 94.6)     |
| Nuts, g/day             | 2.5(1.7, 3.6)       | 3.6(0.8, 3.6)       | 2.3(0.0, 5.7)       | 3.6(2.5, 3.6)       | 4.3(0.0, 30.0)      |
| Desserts, g/day         | 23.5(13.6, 43.6)    | 28.3(15.2, 44.6)    | 13.3(5.2, 21.7)     | 13.6(12.5, 18.9)    | 0.0(0.0, 11.0)      |
| Beverages, ml/day       | 84.3(47.7, 131.7)   | 84.3(69.7, 143.5)   | 1.7(0.0, 83.3)      | 47.7(47.7, 74.8)    | 0.0(0.0, 0.0)       |

Abbreviations: IHPP-I: International Human Phenome Project (phase I); CCC: Central China Cohort; SFFQ: semiquantitative food frequency questionnaire; 24-HDRs: 24-hour dietary recalls.

**Table S4.** Median (interquartile ranges) nutrient intakes estimated by the SFFQ and the 24-HDRs by participant sources.

| Nutrients              | IHPP-I                 |                        |                        | CCC                    |                        |
|------------------------|------------------------|------------------------|------------------------|------------------------|------------------------|
|                        | SFFQ1                  | SFFQ2                  | 24-HDRs                | SFFQ                   | 24-HDRs                |
| Total energy, kcal/day | 1979.6(1706.0, 2322.6) | 1821.1(1610.7, 2281.2) | 1403.2(1156.7, 1805.2) | 1724.9(1366.8, 2055.7) | 1971.8(1558.5, 2286.4) |
| Carbohydrate, g/day    | 220.5(183.6, 293.5)    | 213.1(174.1, 289.2)    | 163.0(125.9, 211.7)    | 205.2(161.0, 248.6)    | 252.4(183.0, 301.3)    |
| Fat, g/day             | 81.1(63.2, 104.6)      | 76.1(59.6, 88.9)       | 53.7(45.8, 75.6)       | 80.4(56.3, 94.0)       | 74.3(58.8, 103.4)      |
| Protein, g/day         | 88.3(71.1, 101.5)      | 82.4(67.6, 95.8)       | 69.9(58.2, 80.2)       | 58.6(47.7, 73.1)       | 60.4(42.3, 66.9)       |
| Fiber, g/day           | 14.2(11.1, 18.3)       | 14.8(10.8, 19.9)       | 7.6(6.1, 10.9)         | 12.7(10.5, 16.0)       | 10.9(8.7, 13.3)        |
| Cholesterol, mg/day    | 546.9(476.8, 708.1)    | 544.3(466.5, 712.5)    | 185.3(115.5, 257.7)    | 451.7(388.2, 492.2)    | 371.5(169.3, 577.2)    |
| Vitamin A, µgRE/day    | 1334.5(826.3, 1497.1)  | 1322.7(843.5, 1508.5)  | 330.8(205.3, 477.6)    | 829.7(719.5, 1252.7)   | 278.5(188.1, 394.5)    |
| Total carotene, µg/day | 2493.3(1836.4, 3225.9) | 2701.7(1728.9, 3376.2) | 758.9(367.1, 1696.5)   | 2072.5(1614.7, 2830.4) | 855.8(356.5, 2374.3)   |
| Retinol, mg/day        | 1006.3(562.8, 1160.7)  | 1015.8(550.2, 1192.7)  | 143.6(86.2, 258.7)     | 575.7(476.6, 915.9)    | 58.0(22.1, 88.5)       |
| Thiamin, mg/day        | 1.0(0.9, 1.2)          | 1.0(0.8, 1.1)          | 0.6(0.5, 0.7)          | 0.8(0.7, 1.0)          | 0.7(0.4, 1.0)          |
| Riboflavin, mg/day     | 1.7(1.4, 2.3)          | 1.6(1.5, 1.9)          | 0.9(0.6, 1.1)          | 1.3(1.0, 1.7)          | 0.7(0.5, 0.8)          |
| Niacin, mg/day         | 20.3(16.6, 26.8)       | 21.8(16.7, 26.9)       | 14.1(11.8, 16.4)       | 12.1(9.5, 14.4)        | 10.7(7.5, 14.2)        |
| Vitamin C, mg/day      | 118.6(102.8, 159.8)    | 117.2(82.2, 167.5)     | 44.4(32.6, 75.6)       | 107.1(88.9, 150.9)     | 58.2(28.4, 99.2)       |
| Vitamin E, mg/day      | 30.7(23.8, 44.0)       | 26.1(20.2, 32.6)       | 13.7(10.4, 18.6)       | 38.5(26.0, 49.6)       | 17.4(10.3, 27.1)       |
| Calcium, mg/day        | 1033.1(844.8, 1276.1)  | 961.5(806.8, 1111.5)   | 438.9(342.7, 558.8)    | 885.5(656.4, 1065.4)   | 347.0(272.8, 463.6)    |
| Phosphorus, mg/day     | 1421.2(1260.2, 1825.1) | 1375.7(1170.2, 1662.9) | 971.3(683.4, 1182.0)   | 1125.3(867.1, 1400.2)  | 788.9(616.5, 959.6)    |
| Potassium, mg/day      | 3165.9(2661.1, 4025.0) | 3223.3(2731.7, 3801.2) | 1790.0(1310.6, 2086.7) | 2401.0(1891.8, 3008.2) | 1467.7(1292.0, 1809.5) |
| Sodium, mg/day         | 7381.2(6917.4, 7740.6) | 7262.6(5373.2, 7724.2) | 1697.7(1454.1, 2156.8) | 7355.3(6992.3, 7473.6) | 560.5(344.2, 881.7)    |
| Magnesium, mg/day      | 406.9(344.1, 498.2)    | 416.3(349.1, 479.2)    | 206.6(167.2, 274.4)    | 341.0(284.2, 404.2)    | 276.2(183.3, 318.6)    |
| Iron, mg/day           | 30.6(28.0, 35.5)       | 30.7(26.0, 35.3)       | 13.7(11.6, 16.9)       | 23.0(20.2, 30.6)       | 16.3(10.8, 19.4)       |
| Zinc, mg/day           | 13.6(10.9, 16.2)       | 13.5(10.4, 15.1)       | 7.4(6.7, 9.9)          | 8.8(8.3, 12.0)         | 6.5(4.7, 8.8)          |
| Selenium, µg/day       | 60.0(46.2, 67.7)       | 55.3(46.1, 65.9)       | 34.4(24.8, 40.7)       | 42.5(35.6, 50.9)       | 34.4(24.6, 43.7)       |
| Copper, mg/day         | 4.5(2.2, 6.8)          | 2.9(2.1, 4.5)          | 0.9(0.8, 1.1)          | 2.2(1.8, 3.1)          | 1.6(1.1, 1.9)          |

|                              |                         |                        |                        |                        |                        |
|------------------------------|-------------------------|------------------------|------------------------|------------------------|------------------------|
| Manganese, mg/day            | 4.8(3.7, 5.6)           | 5.0(3.8, 5.9)          | 2.9(2.1, 3.6)          | 4.0(3.3, 4.9)          | 3.3(2.1, 4.6)          |
| AAA, mg/day                  | 3937.1(3214.7, 5639.1)  | 3878.6(2966.4, 4962.8) | 3258.7(2442.8, 3828.4) | 3512.9(2753.7, 4403.5) | 3983.8(2904.6, 4872.2) |
| BCAA, mg/day                 | 7155.1(5697.4, 10340.2) | 7213.1(5589.7, 9289.6) | 5938.4(4615.5, 7028.9) | 4798.2(3656.8, 5809.7) | 5709.4(4333.9, 7129.9) |
| SAA, mg/day                  | 1284.2(1167.1, 1833.4)  | 1403.0(1042.1, 1671.9) | 1162.3(883.3, 1395.3)  | 872.6(692.1, 1124.5)   | 1300.3(889.0, 1720.2)  |
| TFA, g/day                   | 45.7(35.2, 58.8)        | 41.4(33.1, 51.1)       | 24.4(20.9, 32.4)       | 23.3(17.7, 38.7)       | 54.0(42.1, 80.7)       |
| SFA, g/day                   | 20.5(17.3, 27.6)        | 18.7(15.7, 24.2)       | 9.7(7.9, 14.2)         | 11.9(9.4, 17.3)        | 23.3(16.6, 29.5)       |
| MUFA, g/day                  | 18.3(13.1, 23.0)        | 16.6(13.7, 21.5)       | 10.8(8.1, 14.6)        | 9.2(6.3, 14.3)         | 22.1(19.1, 32.1)       |
| PUFA, g/day                  | 5.2(3.3, 6.6)           | 4.5(3.2, 5.5)          | 4.3(2.7, 5.4)          | 2.3(1.6, 2.9)          | 6.0(4.6, 11.4)         |
| MUFA (% of TFA) <sup>a</sup> | 40.6(38.7, 42.4)        | 41.7(40.4, 42.9)       | 41.8(39.5, 43.2)       | 38.5(35.5, 41.7)       | 42.8(40.4, 46.2)       |
| PUFA (% of TFA) <sup>a</sup> | 10.9(9.3, 12.9)         | 10.3(9.3, 12.5)        | 15.2(11.8, 19.7)       | 9.8(8.8, 10.7)         | 12.1(9.7, 21.8)        |

Abbreviations: SFFQ: semiquantitative food frequency questionnaire; 24-HDRs: 24-hour dietary recalls; AAA: aromatic amino acids; BCAA: branched-chain amino acids; SAA: sulfur-containing amino acids; TFA: total fatty acids; SFA: saturated fatty acids; MUFA: monounsaturated fatty acids; PUFA: polyunsaturated fatty acids.

<sup>a</sup> The percentage of monounsaturated fatty acids or polyunsaturated fatty acids to total fatty acids.

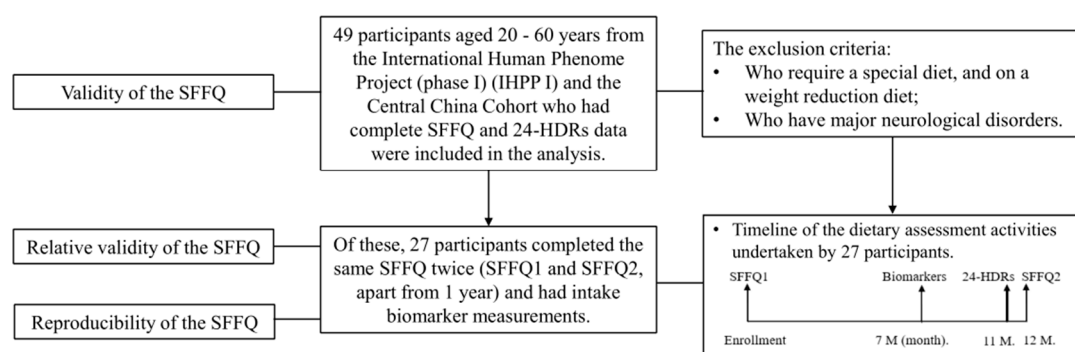

**Figure S1.** Design of the validation study. 49 eligible participants had complete data on semiquantitative food frequency questionnaire (SFFQ) and 24-hour dietary records (24-HDRs) for three days. A subgroup of 27 participants had plasma biomarker measurements relating to fatty acids and repeated SFFQ data (SFFQ1 and SFFQ2, apart from 1 year).

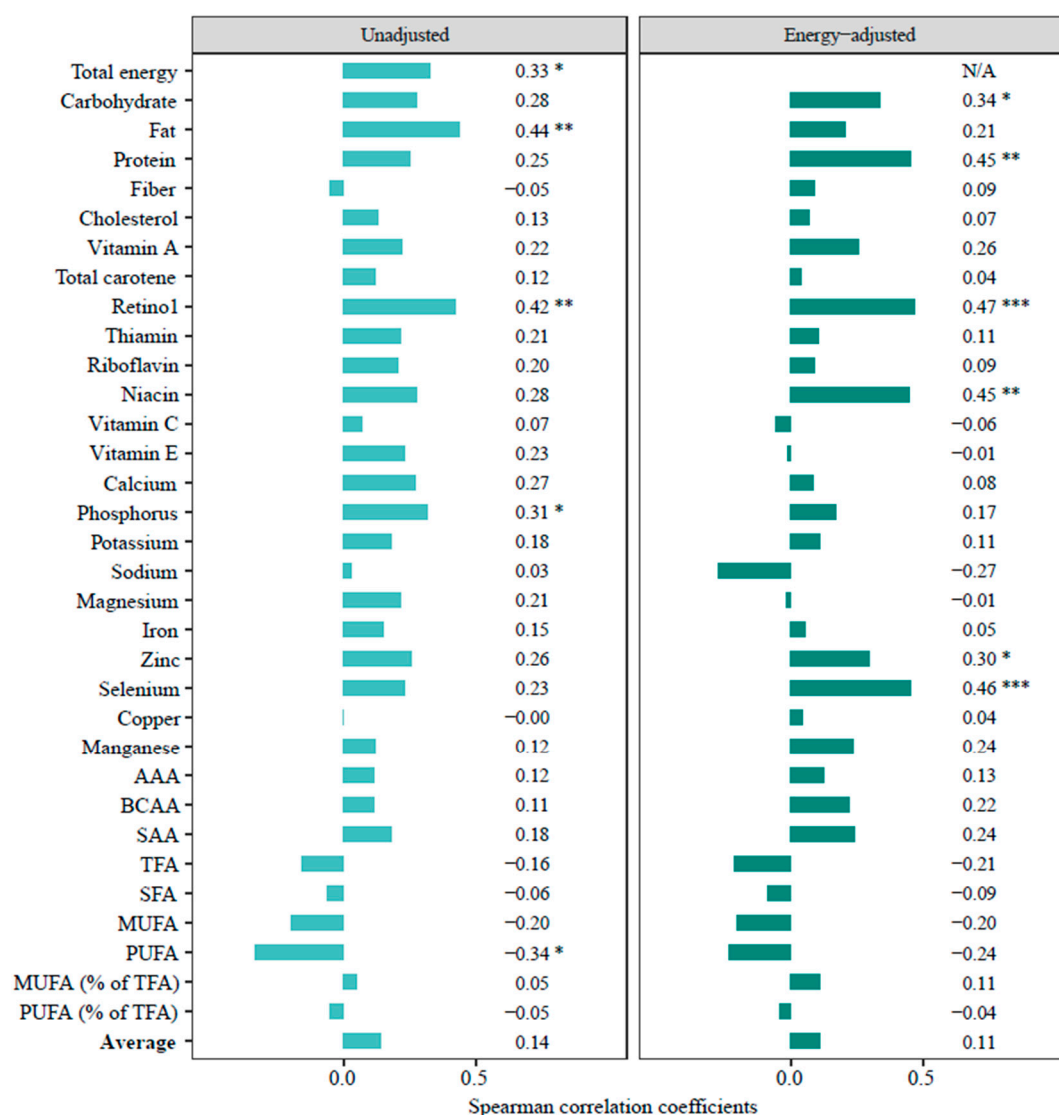

**Figure S2.** Spearman correlation coefficients of nutrient intakes estimated by the SFFQ and the 24-HDRs. Energy-adjusted: Total energy intake was adjusted. \*  $P < 0.05$ ; \*\*  $P < 0.01$ ; \*\*\*  $P < 0.001$ . AAA: aromatic amino acids; BACC: branched-chain amino acids; SAA: sulfur-containing amino

acids; TFA: total fatty acids; SFA: saturated fatty acids; MUFA: monounsaturated fatty acids, PUFA: polyunsaturated fatty acids; MUFA (% of TFA): the percentage of monounsaturated fatty acids to total fatty acids; PUFA (% of TFA): the percentage of polyunsaturated fatty acids to total fatty acids.

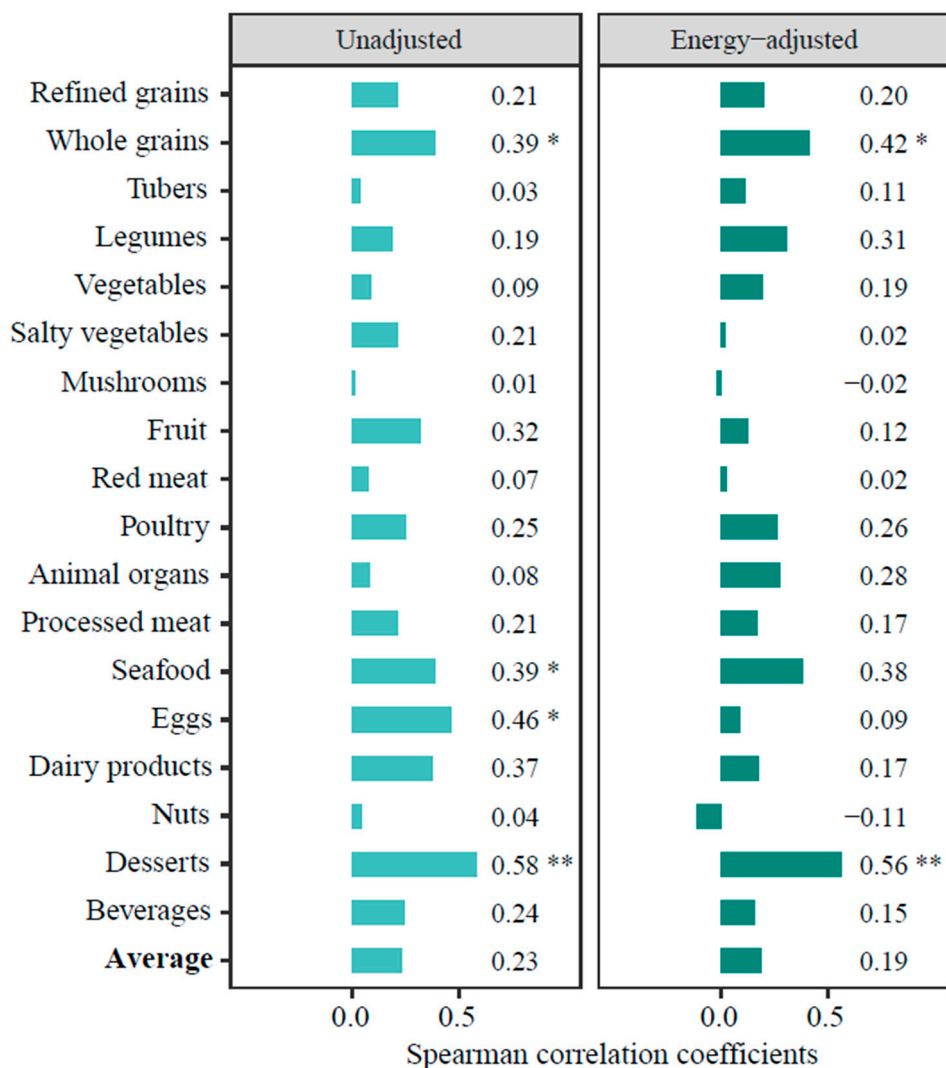

**Figure S3.** Spearman correlation coefficients of food group intakes estimated by the SFFQ and the 24-HDRs in the International Human Phenome Project (phase I). Energy-adjusted: Total energy intake was adjusted. \*  $P < 0.05$ ; \*\*  $P < 0.01$ .

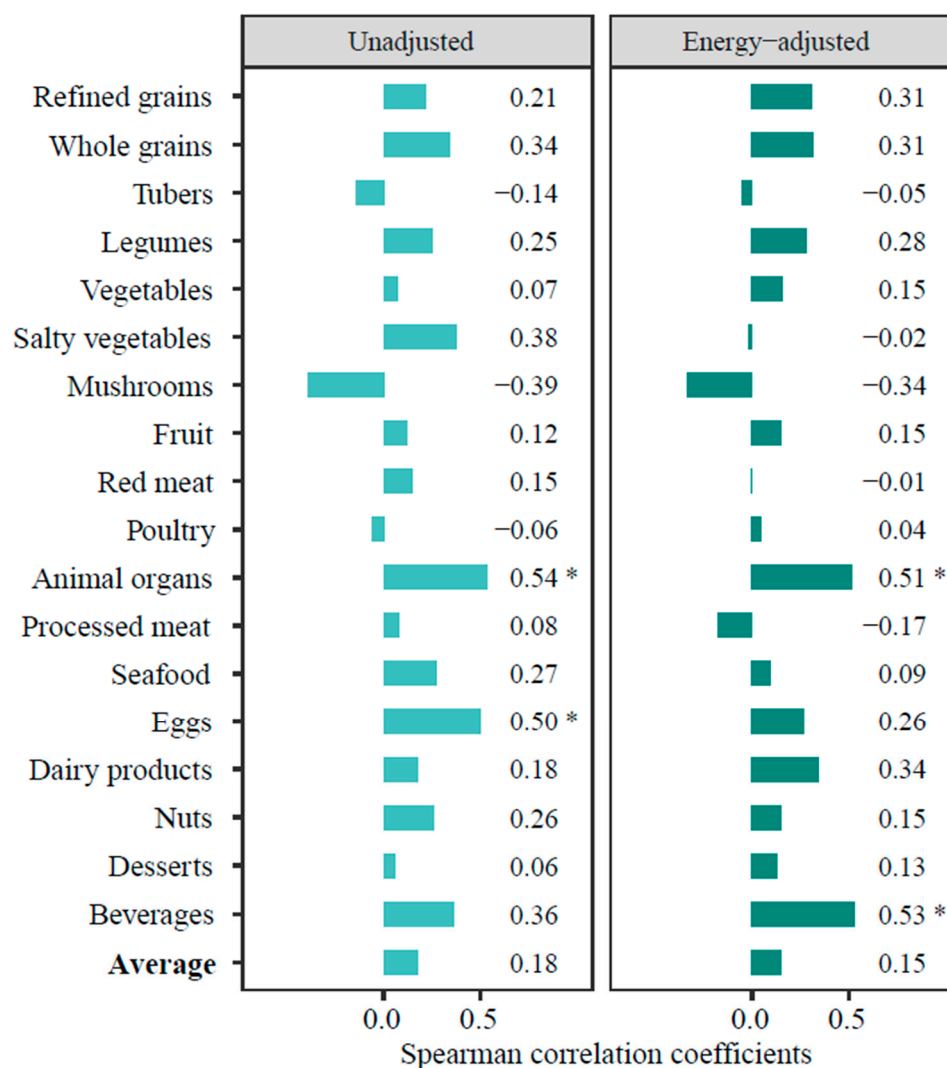

**Figure S4.** Spearman correlation coefficients of food group intakes estimated by the SFFQ and the 24-HDRs in the Central China Cohort. Energy-adjusted: Total energy intake was adjusted. \*  $P < 0.05$ .



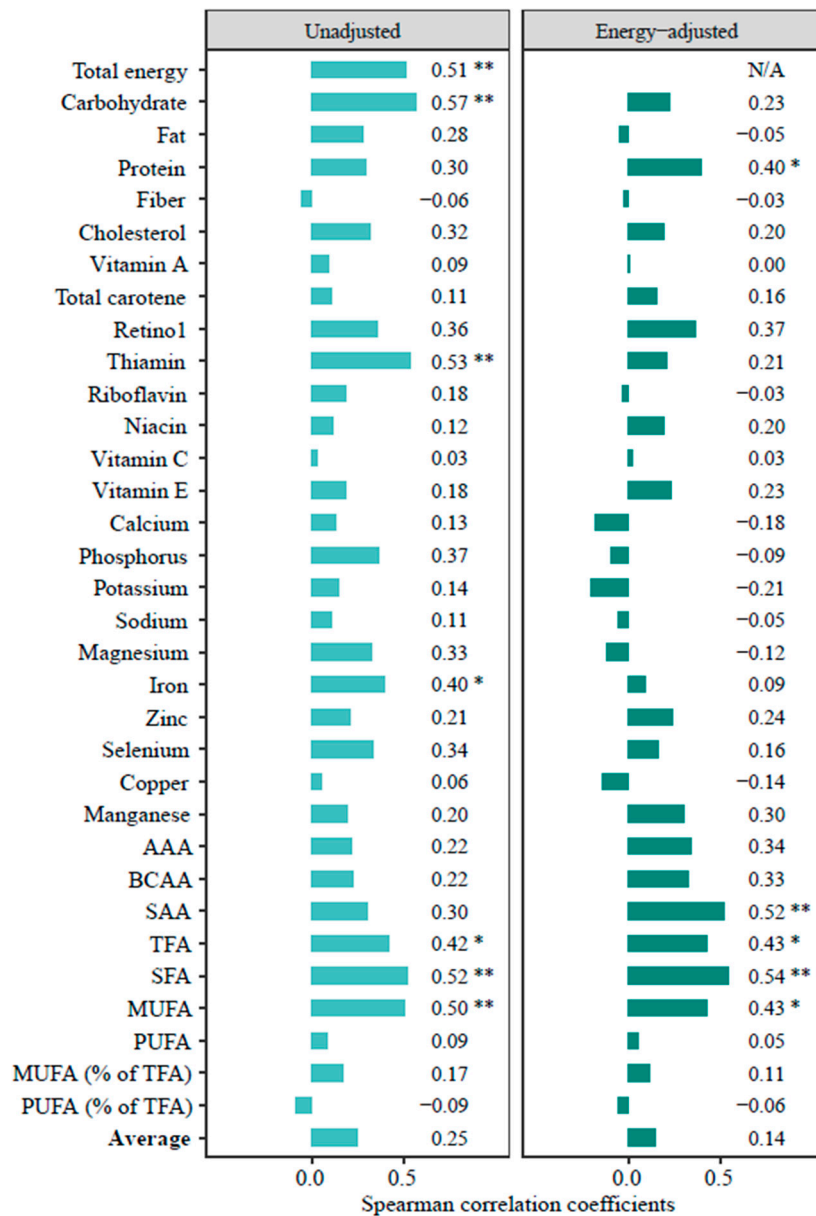

**Figure S5.** Spearman correlation coefficients of nutrient intakes estimated by the SFFQ and the 24-HDRs the International Human Phenome Project (phase I). Energy-adjusted: Total energy intake was adjusted. \*  $P < 0.05$ ; \*\*  $P < 0.01$ . AAA: aromatic amino acids; BACC: branched-chain amino acids; SAA: sulfur-containing amino acids; TFA: total fatty acids; SFA: saturated fatty acids; MUFA: monounsaturated fatty acids; PUFA: polyunsaturated fatty acids; MUFA (% of TFA): the percentage of monounsaturated fatty acids to total fatty acids; PUFA (% of TFA): the percentage of polyunsaturated fatty acids to total fatty acids.

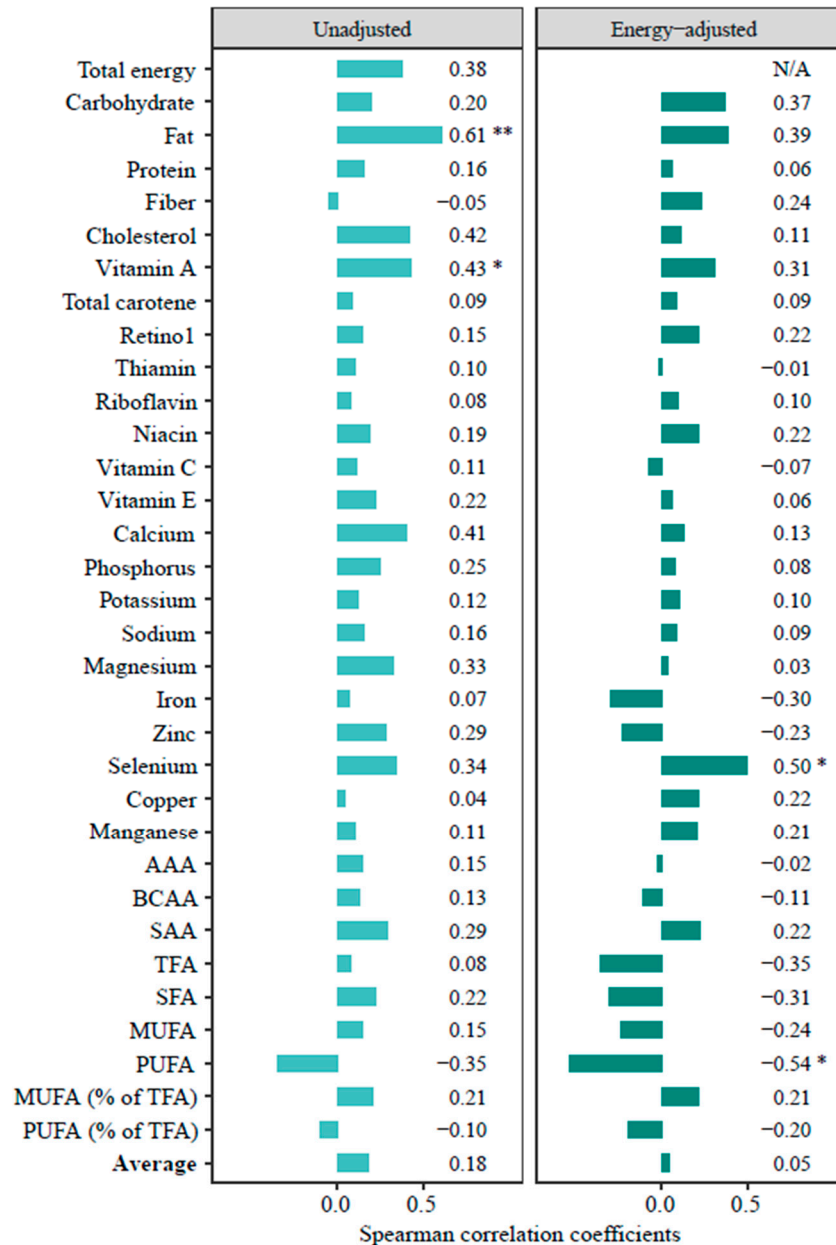

**Figure S6.** Spearman correlation coefficients of nutrient intakes estimated by the SFFQ and the 24-HDRs in the Central China Cohort. Energy-adjusted: Total energy intake was adjusted. \*  $P < 0.05$ ; \*\*  $P < 0.01$ . AAA: aromatic amino acids; BCAA: branched-chain amino acids; SAA: sulfur-containing amino acids; TFA: total fatty acids; SFA: saturated fatty acids; MUFA: monounsaturated fatty acids; PUFA: polyunsaturated fatty acids; MUFA (% of TFA): the percentage of monounsaturated fatty acids to total fatty acids; PUFA (% of TFA): the percentage of polyunsaturated fatty acids to total fatty acids.

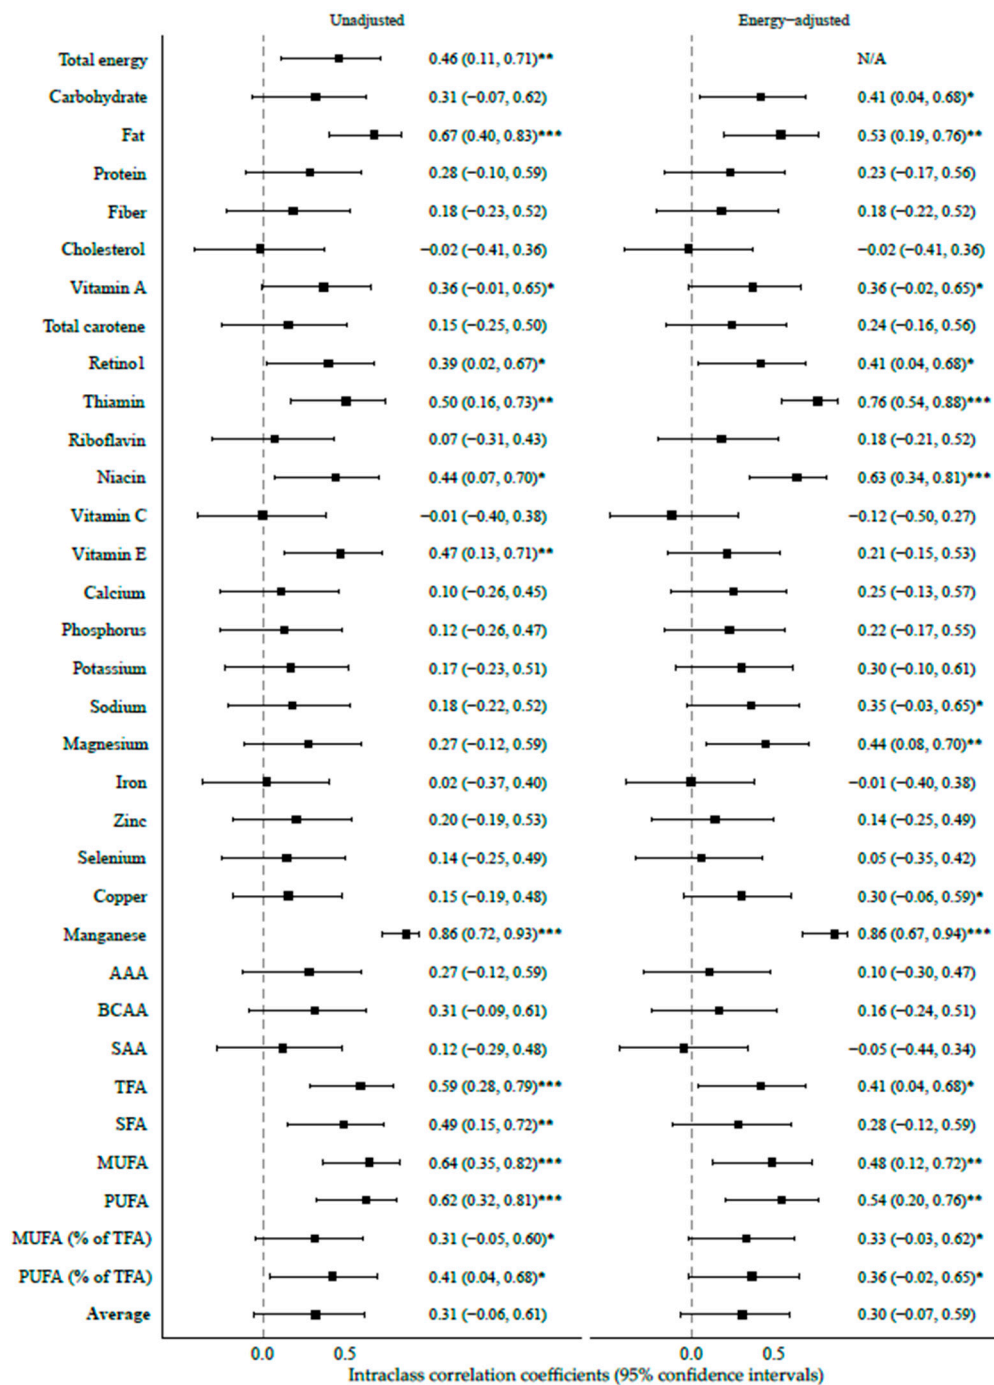

**Figure S7.** Intraclass correlation coefficients (ICCs) and 95% confidence intervals of nutrient intakes estimated by the SFFQ in the International Human Phenome Project (phase I). \*  $P < 0.05$ ; \*\*  $P < 0.01$ ; \*\*\*  $P < 0.001$ . AAA: aromatic amino acids; BCAA: branched-chain amino acids; SAA: sulfur-containing amino acids; TFA: total fatty acids; SFA: saturated fatty acids; MUFA: monounsaturated fatty acids; PUFA: polyunsaturated fatty acids; MUFA (% of TFA): the percentage of monounsaturated fatty acids to total fatty acids; PUFA (% of TFA): the percentage of polyunsaturated fatty acids to total fatty acids.
